## MIGRATION AND RANGING OF PEREGRINE FALCONS WINTERING ON THE GULF OF MEXICO COAST, TAMAULIPAS, MEXICO

MICHAEL J. MCGRADY<sup>1,3</sup>, THOMAS L. MAECHTLE<sup>1</sup>, JUAN J. VARGAS<sup>2</sup>, WILLIAM S. SEEGAR<sup>1</sup>  
AND M. CATALINA PORRAS PEÑA<sup>2</sup>

<sup>1</sup>Earthspan, 12265 Harford Road, Glen Arm, MD 21057

<sup>2</sup>Fundación Ara, Antiguo Camino al Diente 3333, La Estanzuela, C.P. 64988, Monterrey, N.L., México

**Abstract.** Movements of 11 female and 1 male adult Peregrine Falcons (*Falco peregrinus*) wintering in coastal Gulf of Mexico, Tamaulipas, Mexico, were monitored with satellite-received transmitters (PTTs), 1997–1998. Median areas for minimum convex polygon winter home ranges at 50% and 90% levels (both years) were 1173 and 8311 ha, respectively. Most birds left wintering grounds in the first week of May. Duration of northward migration averaged 30 days. Distances between capture location and summer settling place were between 4580 and 5844 km; birds traversed 40.4–46.4 degrees of latitude. Birds summered between far western Canada and coastal west Greenland. One was followed to the same summering ground in both years. Autumnal migration routes were through the middle of the continent, and initiated in August and September. Falcons arrived on wintering grounds in September and October, averaging 40 days to make the journey. PTT data and capture locations of birds trapped in more than 1 year suggest fidelity to wintering areas, although perhaps not particular winter home ranges.

**Key words:** bird migration, *Falco peregrinus*, Mexico, nonbreeding grounds, Peregrine Falcon, winter ranging.

### Migración y Áreas de Ocurrencia de Halcones Peregrinos Invernantes en la Costa del Golfo de México, Tamaulipas, México

**Resumen.** Entre 1997 y 1998, se monitorearon con transmisores de satellite (PTTs) los movimientos de 12 halcones peregrinos adultos (*Falco peregrinus*; 11 hembras y 1 macho) invernando en la costa del Golfo de México, Tamaulipas, México. Se utilizaron niveles de precisión del 50% y 90% en los polígonos mínimos estimados para describir los hábitos hogareños de invernada (en ambos años); éstos fueron de 1173 y 8311 ha, respectivamente. La mayoría de las aves abandonaron las áreas de invernada en la primera semana de mayo. La duración de la migración hacia el Norte promedió 30 días. Las distancias entre los lugares donde las aves fueron capturadas y donde se establecieron en el verano variaron entre 4580 y 5844 km; así que éstas recorrieron entre 40.4 y 46.4 grados de latitud. Los halcones pasaron el verano entre el lejano oeste de Canadá y la costa oeste de Groenlandia. Uno de ellos fue seguido en ambos años hasta la misma área de verano. Las rutas migratorias del otoño tuvieron lugar a través del centro del continente y se iniciaron en agosto y septiembre. Los halcones peregrinos llegaron a las áreas de invernada en septiembre y octubre, promediando 40 días para hacer el recorrido. Los datos de los PTTs e información sobre las ubicaciones de los lugares de captura de las aves atrapadas en más de un año sugieren fidelidad a las áreas de invierno, pero tal vez no a hábitos hogareños particulares.

### INTRODUCTION

Like other long-distance-migrant birds, Peregrine Falcons (*Falco peregrinus*) that breed in the far north spend more time on migration and wintering (nonbreeding) areas than on breeding

areas. While migration patterns and wintering requirements of some taxa, such as passerines, are well studied (Rappole et al. 1979, Winker et al. 1990, Ramos and Rappole 1994), little is known about the winter ecology of peregrines (Palmer 1988, Ratcliffe 1993). This gap in information may undermine conservation efforts, which are based on data collected primarily on the breeding grounds.

Nearctic breeding grounds of Peregrine Falcons extend across the continent from arctic Alaska to Labrador including the southern arctic

Manuscript received 2 March 2001; accepted 9 November 2001.

<sup>3</sup> Present address: Natural Research, Ltd., Am Roshöhügel 59, A-3500, Krems, Austria. E-mail: mikejmcgrady@aol.com

islands, and coastal Greenland as far north as 79°N latitude. Wintering grounds of these northern falcons extend from coastal areas of the mid-Atlantic United States (~39°N) and British Columbia (~50°N) south to Argentina (~39°S) (Palmer 1988, Fuller et al. 1998). Coastal Gulf of Mexico, especially Padre Island, Texas, has long been known as an important site of concentration of migrating peregrines, even during years when North American peregrine population levels were relatively low (Enderson 1969, Hunt et al. 1975).

Migrating falcons cover large distances (Kuyt 1967, Fuller et al. 1998), and banding data show that some falcons wintering along the coast of the Gulf of Mexico breed in arctic regions of North America (Yates et al. 1988). The Gulf Coast of Mexico and the U.S. is important to migrating (Yates et al. 1988), staging (Hunt and Ward 1988), and wintering Peregrine Falcons (Enderson et al. 1995). Apart from work by Enderson et al. (1995), little is known about Peregrine Falcon wintering ranges along the Gulf Coast of Mexico, although there are studies from other regions of hunting behavior during winter and migration (Dekker 1988, Cresswell and Whitfield 1994, Buchanan 1996).

Satellite-received telemetry has been useful in determining migration paths of large raptors (Meyburg et al. 1995, Ueta et al. 2000), including Peregrine Falcons (Fuller et al. 1998). Tracking via satellite is particularly appropriate when long-distance movements or movements to remote areas are of interest, but poor accuracy of location estimates may obscure results, particularly at smaller scales (Britten et al. 1999). The present paper reports satellite-received movement data from Peregrine Falcons wintering on the Gulf of Mexico coast, Tamaulipas, Mexico.

## METHODS

Wintering peregrines were studied on the Gulf of Mexico coast between 22°17'N (Tampico) and 25°52'N latitudes (Matamoros), an area centered on the towns of La Pesca and Tepehuaje. Barrier islands (100–200 m wide) separate the Laguna Madre from the Gulf of Mexico, and sandy beaches, approximately 5–20 m wide at high tide, characterize the area. The western sides of the islands are covered in grasses such as seacoast bluestem (*Schizachyrium scoparium littoralis*), small shrubs such as partridge pea (*Cassia fasciculata*), and mangroves, (*Avicennia*

*germinans*, *Rhizophora mangle*, *Languncularia racemosa*). Tide and weather conditions periodically flood the mud flats that line the Laguna Madre, particularly often during winter. Large numbers of shorebirds and waterfowl winter in the Laguna Madre (Morrison et al. 1993), and are preyed upon by wintering peregrines. The mainland west of the laguna has been largely converted to ranchland, and forest fragments are small. Prey abundance inland is most certainly less than on the coast during winter, but concentrations of Rock Doves (*Columba livia*) occur near cattle sheds.

During 11–24 January 1997 and 17 February–11 March 1998, wintering Peregrine Falcons were captured, banded, and released. Trapping efforts covered about 300 km of beach near La Pesca and Tepehuaje in 1997 and 1998, and about 100 km of beach near Matamoros in 1998. Capture locations were recorded using a handheld GPS receiver. Twelve adults were also fitted with backpack-mounted satellite-received transmitters (PTTs). PTTs (30 g for females, 20 g for males) were programmed to transmit 8 hr on, 24 hr off for 35 cycles, 8 hr on, 72 hr off for 25 cycles, then 8 hr on, 192 hr off for at least 18 cycles, running until battery failure. Total days in each cycle were 46.7, 83.3, and >150 respectively, arranged to transmit mostly on the wintering ground, but some power was reserved to track birds on their spring migration, on their summering grounds, and on autumn migration. Twenty-gram transmitters had a theoretical battery life of ~500 hr, 30-g transmitters ~800 hr. In the days immediately following capture, some falcons were resighted. Transmitters appeared to be well tolerated, and recaptured falcons ( $n = 3$ ) showed no adverse physical effect due to transmitters.

Falcon location estimates were calculated by the ARGOS system (Service Argos 2001). The system estimates location using the Doppler shift in signal frequency, and calculates the distribution within which the estimate lies. The standard deviation of this distribution estimates the accuracy of the location, and assigns it to a location class (LC: Z, B, A, 0, 1, 2, 3, in ascending accuracy). LC 1, 2, and 3 have standard deviations of 350 m–1 km, 150–350 m and ≤150 m, respectively. We used only datapoints with location classes 1–3 for our analyses. Despite this restriction, outliers may have existed

for which the location estimate was inaccurate by  $>1$  SD.

PTTs did not perform equally. Causes for variation among PTTs in the percentage of LC 1–3 estimates include variation in signal quality. Variation in PTT longevity was probably due mostly to differences in battery quality. In general, as the study proceeded signal strength declined, resulting in a lower rate of acceptable location classes being received. The rate of deterioration of signal also varied.

#### STATISTICAL ANALYSES

Analyses of ranges were performed using RANGES V software (Kenward and Hodder 1996). Areas used by peregrines during winter were described by 90% and 50% minimum convex polygons (MCP, Mohr 1947, Kenward 1987). Overall winter home range extent was described by the 90% MCP. Describing ranges in this way probably excluded some accurate location estimates, but also lessened the effect of outliers described above. We defined 50% polygons as core area, although the duty cycle of the transmitters was not ideal for identifying centers of activity. Distances between wintering and summering areas were measured between the last LC 1–3 received on the wintering area to the first LC 1–3 received on the breeding area, and vice-versa. Migrations were measured as great circle distances (Fuller et al. 1998). Because PTTs did not transmit continuously, timing of migration could only be determined to within 4 days. Date of departure was defined as the last date the PTT was received from summering or wintering areas. Likewise, date of arrival was the first date the PTT was received from either area. Values reported are means  $\pm$  SD unless otherwise stated. Independent, two tailed *t*-tests were performed using Statistix for Windows software (Analytical Software 1998).

In the course of capturing birds all sightings of peregrines were recorded. Because the focus was on capture rather than survey, some double-counting probably occurred. Also, observations of peregrines could not always be assigned to a particular sex or age category.

#### RESULTS

An estimated 84–110 individual falcons were sighted,  $\geq 30$  in 1997 and  $\geq 54$  in 1998. Few falcons were immature ( $\sim 4$ –9%) or male ( $\sim 2$ %). Thirty-three Peregrine Falcons were

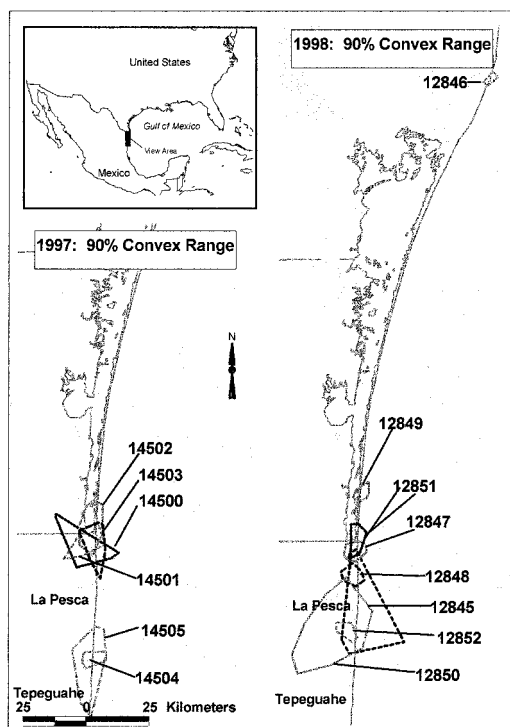

FIGURE 1. Location estimates and 90% minimum convex polygons of Peregrine Falcons wintering on the Gulf of Mexico coast, Tamaulipas, Mexico, in 1997 and 1998.

captured (23 adult females, 8 immature females, 2 adult males). Fourteen PTTs were fitted to 12 adult Peregrine Falcons, (6 females in 1997, 1 male and 7 females in 1998; 2 of the 1998 females had been tracked in 1997). One female (PTT 12846) was fitted with a 20-g transmitter in 1998 because no males were available for capture.

#### WINTERING AREAS

Mean area of 90% MCP for all birds was  $169 \pm 191$  km<sup>2</sup> (Fig. 1, Table 1). MCP values were not significantly different between years at the 50% ( $t_{12} = -0.7$ ,  $P = 0.45$ ) or the 90% levels ( $t_{12} = -0.1$ ,  $P = 0.80$ ). The male falcon had the second largest range. There was extensive range overlap within years.

Centers of activity for most peregrines throughout winter were near their capture site. For some individuals (PTTs 14505, 12845, 12850, and 12851), geographically distinct clusters of location estimates suggested more than one activity center. MCPs can overestimate

TABLE 1. Size of winter ranges of adult Peregrine Falcons on the Gulf of Mexico coast, Tamaulipas, Mexico, in 1997 and 1998. PTT number 12845 (1998) was the only male tracked.

| Year           | PTT number | Number of location estimates ( <i>n</i> ) | Area of 50% convex polygon (ha) | Area of 90% convex polygon (ha) |
|----------------|------------|-------------------------------------------|---------------------------------|---------------------------------|
| 1997           | 14500      | 31                                        | 1220                            | 19 770                          |
|                | 14501      | 35                                        | 1239                            | 10 938                          |
|                | 14502      | 48                                        | 2357                            | 14 986                          |
|                | 14503      | 34                                        | 1833                            | 12 510                          |
|                | 14504      | 36                                        | 648                             | 4785                            |
|                | 14505      | 27                                        | 4927                            | 28 408                          |
| 1997 mean      |            |                                           | 2037 ± 1531                     | 15 232 ± 8115                   |
| 1997 median    |            |                                           | 1536                            | 13 748                          |
| 1998           | 12845      | 22                                        | 9278                            | 53 346                          |
|                | 12846      | 20                                        | 251                             | 1683                            |
|                | 12847      | 42                                        | 728                             | 4917                            |
|                | 12848      | 35                                        | 516                             | 4972                            |
|                | 12849      | 28                                        | 840                             | 2694                            |
|                | 12850      | 33                                        | 29 481                          | 68 965                          |
|                | 12851      | 23                                        | 1127                            | 5684                            |
|                | 12852      | 18                                        | 417                             | 3691                            |
| 1998 mean      |            |                                           | 5329 ± 10 218                   | 18 244 ± 26 843                 |
| 1998 median    |            |                                           | 784                             | 4944                            |
| Overall mean   |            |                                           | 3918 ± 7243                     | 16 953 ± 19 104                 |
| Overall median |            |                                           | 1173                            | 8311                            |

range size by including areas between clusters that are unused by falcons. When ranges that had more than one activity center were excluded, range sizes in 1997 were larger than in 1998 at both the 50% ( $t_8 = 2.9$ ,  $P < 0.02$ ) and 90% level ( $t_8 = -3.5$ ,  $P < 0.01$ ). Two falcons were marked in both years (Fig. 2). Both had larger winter home ranges in 1997 than 1998, and between-year overlap of ranges was high. At the 50% MCP level polygons included primarily areas of barrier island and laguna.

#### NON-WINTER MOVEMENTS

Spring departures were between ~27 April and ~21 May ( $n = 14$ ; Table 2). There was no between-year difference in dates on which northward migration began. Of the two females tracked in both years, one began migration seven days later in 1998 than it had in 1997; the other began migration four days earlier in 1998 than 1997.

Birds traveled north through the center of the continent, dispersing to sites across the Canadian north coast and Greenland from 123.0°W to 51.8°W longitude ( $n = 13$ ; Fig. 3). Both birds tracked on their northward migration in consecutive years appeared to use the same general mi-

gration paths, although data were incomplete in 1998.

The migratory period for 12 of 13 birds lasted into the first half of June. Over the two northward migrations, the mean rate of travel was  $171.6 \pm 33.2$  km day<sup>-1</sup> ( $n = 13$ ). In 1997, the mean rate was  $153.2 \pm 21.8$  km day<sup>-1</sup> ( $n = 6$ ); in 1998 it was  $187.3 \pm 34.4$  km day<sup>-1</sup> ( $n = 7$ ). All birds monitored to summering grounds where more than 10 location estimates were received ( $n = 13$ ) settled into relatively restricted areas (Fig. 3). Mean degrees of latitude traversed between winter and summer areas was  $43.8 \pm 1.7$ .

Dates of initiation of autumn migration could not be identified precisely because PTTs were transmitting every 7.3 days. Falcons monitored on autumn migration ( $n = 9$ ) left their summering sites in August and September, and migrated along a non-coastal route to Mexico (Fig. 4). On average, Peregrine Falcons took  $39.7 \pm 11.7$  days to complete autumn migration at a mean rate of  $141.5 \pm 45.9$  km day<sup>-1</sup> ( $n = 6$ ).

Falcons arrived on their wintering grounds in September and October. Falcons showed fidelity to wintering areas, but we could not determine if they settled on the same wintering territories.

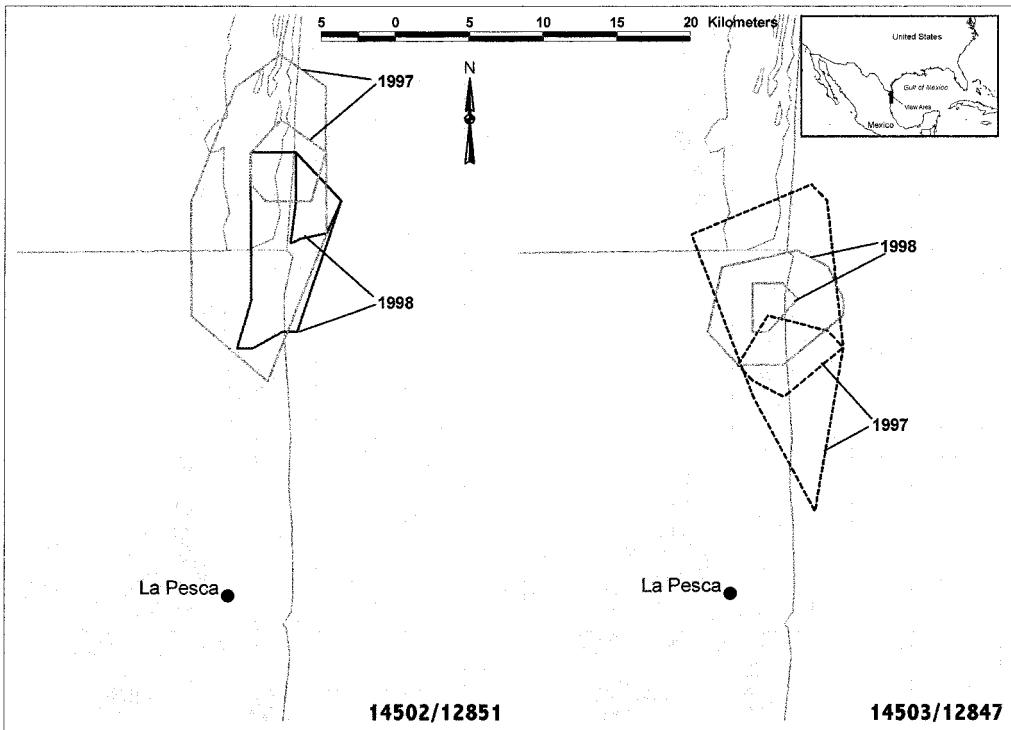

FIGURE 2. Winter ranges (90% and 50% MCP) of two female Peregrine Falcons tracked in both 1997 and 1998 on the Gulf of Mexico coast, Tamaulipas, Mexico. Numbers in the lower right of each panel indicate the transmitter numbers worn by each individual in each year.

Falcons followed to their wintering grounds in the year subsequent to capture ( $n = 6$ ) were located close to capture places, although few location estimates were made in the second winter. The distances between capture locations for the two birds that were trapped in both years were 2080 and 5598 m, and the 1997 and 1998 winter home ranges of each of these birds overlapped extensively (Fig. 2). One falcon was caught in 1996 by other researchers and recaptured 500 m away in 1997 by us.

#### DISCUSSION

The Tamaulipas coast is an important wintering area for female peregrines. Neither males nor immatures winter there in proportion to their abundance, although they do migrate through in spring and autumn (Hunt et al. 1975, Hernández and Zook 1993). Coastal wintering areas in Ecuador and Peru appear also to be populated mostly by female falcons (White et al. 1989), although observations and trapping of peregrines in a coastal area near Lima, Peru (1989–

1992), suggest males predominate there (O. Beingolea, pers. comm.). Male peregrines banded as nestlings in Greenland wintered in South America, whereas females wintered in Central America and the Caribbean (Restani and Mattox 2000). The causes of this apparent separation of sexes and age classes on wintering grounds are not known.

Arrival of falcons in our study area coincided with the peak of peregrine migration (25 September to 25 October) at Padre Island (TLM, unpubl. data), and was similar to arrival dates of peregrines wintering in Peru (Bertochi et al. 1984).

Distribution of prey likely affects location of peregrine wintering areas (Fuller et al. 1998), diet, and individual ranging behavior (Buchanan 1996). The distribution of small and medium-sized shorebirds, probably the most abundant potential prey for peregrines in our study area, was likely related to the extent of mudflats and beach where they fed, which was determined by wind conditions and tide. Winter home range

TABLE 2. Summary of Peregrine Falcon migration from wintering grounds on the Gulf of Mexico coast, Tamaulipas, Mexico, to summer settling areas in 1997 and 1998. Two individuals were tracked in both years: 14502 and 14503 in 1997 refer to 12851 and 12847, respectively, in 1998. 12845 (1998) was the only male tracked.

| PTT number | Depart winter | Arrive summer | Depart summer | Arrive winter | Last location | Harmonic mean of wintering area |           | Summer location <sup>a</sup> | Harmonic mean of summering area |           | Diff in lat (°) |
|------------|---------------|---------------|---------------|---------------|---------------|---------------------------------|-----------|------------------------------|---------------------------------|-----------|-----------------|
|            |               |               |               |               |               | lat (°N)                        | long (°W) |                              | lat (°N)                        | long (°W) |                 |
| 1997       |               |               |               |               |               |                                 |           |                              |                                 |           |                 |
| 14500      | 10 May        | 14 Jun        |               |               | 20 Sep        | 23.93                           | 97.72     | Repulse Bay, Nun             | 66.18                           | 84.66     | 42.25           |
| 14501      | 7 May         | 4 Jun         | 16 Sep        |               | 30 Sep        | 23.96                           | 97.74     | Thelon River, Nun            | 65.03                           | 101.74    | 41.07           |
| 14502      | 3 May         | 31 May        | 17 Aug        | 27 Sep        | 28 Dec        | 24.04                           | 97.74     | Coronation Gulf, Nun         | 67.68                           | 110.69    | 43.64           |
| 14503      | 21 May        | 25 Jun        | 25 Sep        | 24 Oct        | 3 Jan         | 23.94                           | 97.70     | Baffin Island, Nun           | 64.39                           | 71.06     | 40.45           |
| 14504      | 27 Apr        | 6 Jun         | 20 Aug        | 6 Oct         | 20 Dec        | 23.57                           | 97.75     | Pelly Bay, Nun               | 68.57                           | 91.38     | 44.00           |
| 14505      | 13 May        | 11 Jun        |               |               | 10 July       | 23.66                           | 97.73     | Victoria Island, Nun         | 68.62                           | 113.47    | 44.96           |
| 1998       |               |               |               |               |               |                                 |           |                              |                                 |           |                 |
| 12845      | 10 May        | 10 Jun        | 3 Sep         |               | 3 Sep         | 23.64                           | 97.75     | Melville Peninsula, Nun      | 68.31                           | 81.80     | 44.67           |
| 12846      | 30 Apr        | 7 Jun         |               |               | 20 Jul        | 25.66                           | 97.18     | Franklin Strait, Nun         | 72.11                           | 96.55     | 46.45           |
| 12847      | 17 May        |               |               |               | 27 May        | 23.94                           | 97.74     |                              |                                 |           |                 |
| 12848      | 1 May         | 2 Jun         | 30 Aug        | 25 Oct        | 10 Nov        | 23.86                           | 97.74     | Victoria Island, Nun         | 69.81                           | 110.39    | 45.94           |
| 12849      | 27 Apr        | 19 May        |               |               | 4 Nov         | 24.18                           | 97.73     | Coronation Gulf, Nun         | 67.51                           | 113.97    | 43.33           |
| 12850      | 6 May         | 31 May        | 23 Aug        | 16 Sep        | 11 Nov        | 23.87                           | 97.77     | Franklin River, NWT          | 68.13                           | 123.01    | 44.26           |
| 12851      | 10 May        | 5 Jun         | 22 Aug        |               | 17 Oct        | 23.93                           | 97.76     | Coronation Gulf, Nun         | 67.73                           | 110.54    | 43.80           |
| 12852      | 1 May         | 27 May        | 5 Sep         | 16 Oct        | 18 Nov        | 23.68                           | 97.80     | W. Greenland                 | 68.28                           | 51.84     | 44.60           |

<sup>a</sup>NWT = Northwest Territories, Canada; Nun = Nunavut, Canada.

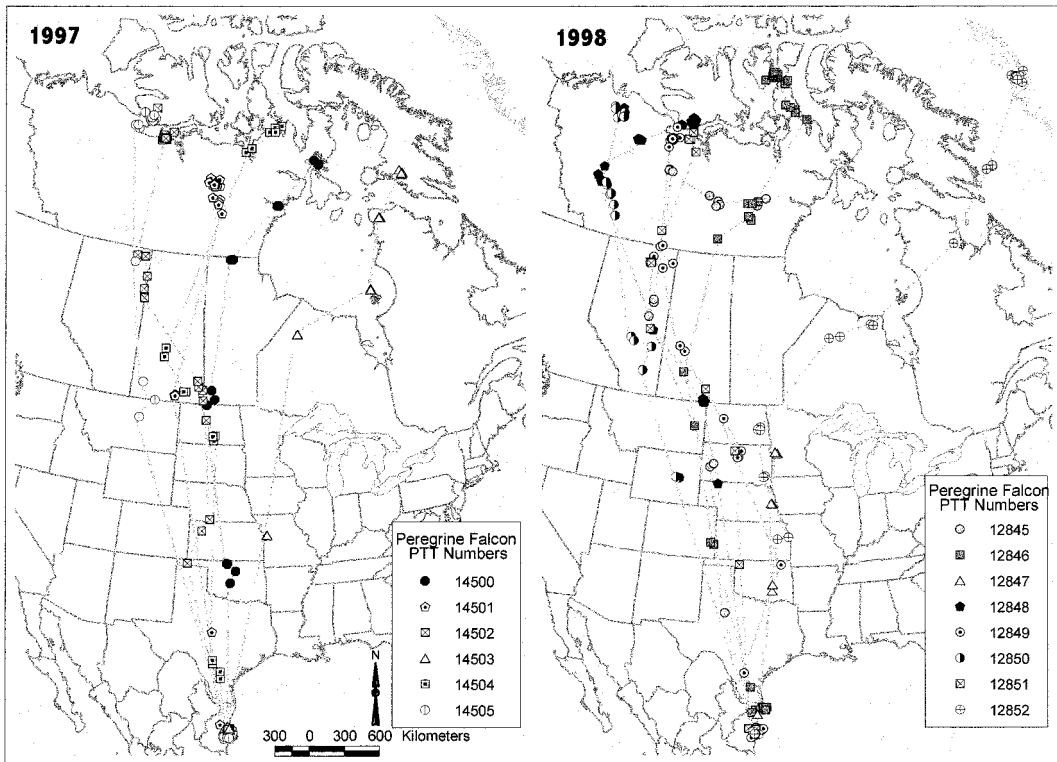

FIGURE 3. Northward (spring) migration and summering areas of Peregrine Falcons that wintered on the Gulf of Mexico coast, Tamaulipas, Mexico, in 1997 and 1998.

sizes were within the bounds of published values (Dobler and Spencer 1989, Enderson et al. 1995). Between-year differences in size of ranges with only one cluster of activity might have been due to differences in prey distribution and availability, but could have been influenced by the shorter study period in 1998.

The islands and laguna appeared to be most important to peregrines, but falcons were also located relatively far offshore and at inland sites. Peregrines hunt over the ocean (Enderson et al. 1995, Buchanan 1996), and from boats at sea (Grayson 1872, Byers 1957, Craddock and Carlson 1970), and use offshore oil platforms in the Gulf of Mexico (Enderson et al. 1995, Russell 2001). Locations inland may be related to food (e.g., pigeons at cattle barns) or inland roosting. Enderson et al. (1995) recorded inland locations of radio-tagged peregrines wintering on the Texas coast.

Information on peregrine migration comes from sightings (Dekker 1984, Kerlinger 1989), banding (Ambrose and Riddle 1988, Yates et al.

1988), and VHF and satellite telemetry (Chavez-Ramirez et al. 1994, Fuller et al. 1998); autumn migration routes are better documented. All birds in this study migrated through the central part of the continent (in spring and autumn), but band recoveries show that some peregrines that pass through or winter on the Gulf coast migrate along East Coast and West Coast flyways (Shor 1970, Yates et al. 1988). Further, some migrating Peregrine Falcons tagged with PTTs on the Virginia coast in autumn migrated along an inland route in spring to Greenland (WSS, unpubl. data). Our data agree with Fuller et al. (1998) in suggesting that features such as mountain ranges produce local effects on migration and that the shape of peregrine migration in North America can be better viewed as the result of a sieving rather than a funnel or fanning effect.

Spring migration by peregrines in Mexico appears to have occurred about 2 weeks later than in Peru (Bertochi et al. 1984), but at a time similar to that observed in Costa Rica (Hernández and Zook 1993) and North Dakota (Murphy and

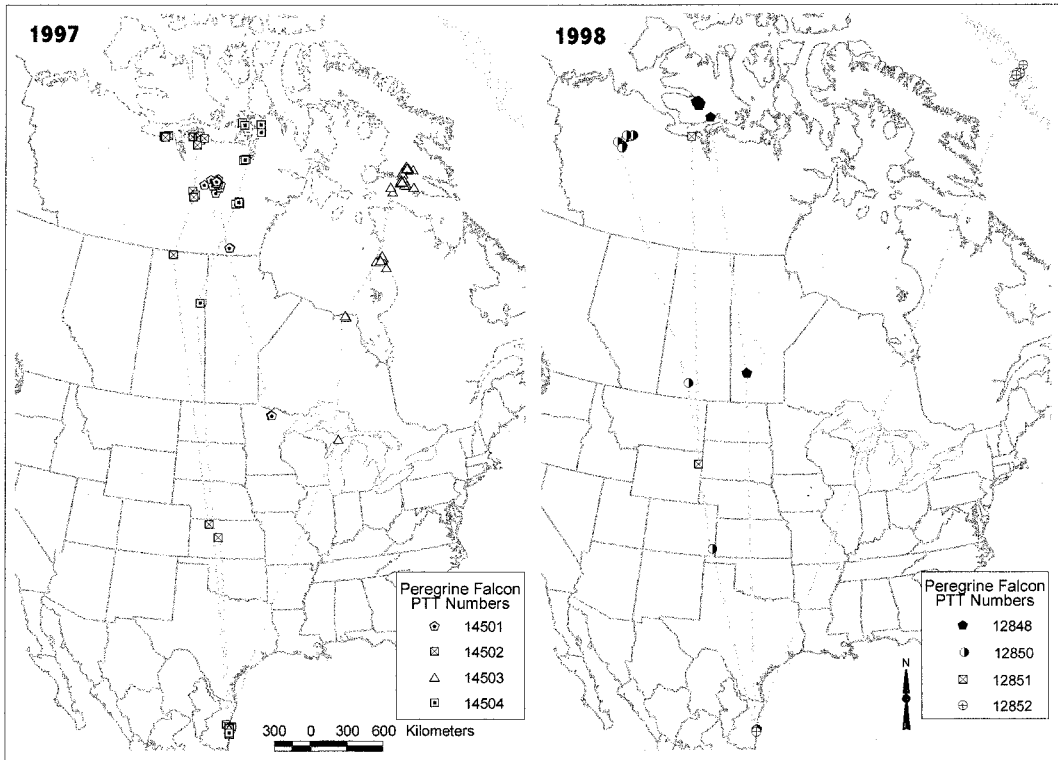

FIGURE 4. Summering areas and southward (autumn) migration of Peregrine Falcons in 1997 and 1998 that wintered on the Gulf of Mexico coast, Tamaulipas, Mexico.

Green 1992). Differences from Peru may be related to latitude of wintering ground, location of breeding place, age of peregrines, observation bias, or annual variation.

A peregrine migration peak occurs on Padre Island from 10 April to 3 May (TLM, unpubl. data), somewhat earlier than the departure date of tagged peregrines in this study. Together, date of departure from our study area, the earlier migration date in Peru, and the peak observed on Padre Island agree with Enderson (1965), White (1968), and Schmutz et al. (1991) in suggesting a leapfrog migration.

PTT transmission rate was low during migration, probably resulting in a smoothing of the path and an underestimation of migration rate. In general, rates of migration by falcons in this study agree with those from other peregrines fitted with PTTs (Fuller et al. 1998), but were slower than that of a single bird followed by Chavez-Ramirez et al. (1994).

Peregrines spend a large proportion of their year on migration and wintering grounds. Large

gaps exist in our understanding of peregrine ecology at these times, which potentially undermine conservation efforts. Our data add detail to what is known about timing and route of migration, provide new information on winter range size, and the geographical spread of summering ranges of birds wintering in the same location, and suggest that peregrines are faithful to their wintering areas. It is important that more peregrine research is focused away from breeding grounds, where threats to Peregrine Falcons may be greatest (Iñigo and Dominguez 1989).

#### ACKNOWLEDGMENTS

Funding was provided by Fundación ARA, A.C., a nongovernmental organization dedicated to the conservation of Mexican birds and their habitats, through the support of its president, Sra. Maca Garza L. de Romo and its chief benefactor, Pulsar Internacional, Monterrey, Mexico. L. Schueck contributed significantly to this research through data management, analysis, and map production. The authors would like to recognize the contributions of J. Dayton, D. Garza Tabón, R. Munro Wilson, M. Fuller, C. Carlisle, and O.



Beingolea. Reviews by E. Iñigo Elias, J. Enderson and C. White improved earlier drafts.

## LITERATURE CITED

- ANALYTICAL SOFTWARE. 1998. Statistix for Windows user guide. Analytical Software, Tallahassee, FL.
- AMBROSE, R. E., AND K. E. RIDDLE. 1988. Population dispersal, turnover, and migration of Alaska peregrines, p. 677–684. *In* T. J. Cade, J. H. Enderson, C. J. Thelander, and C. M. White [EDS.], *Peregrine Falcon populations: their management and recovery*. The Peregrine Fund, Inc., Boise, ID.
- BERTOCHI, L. E., G. CASTRO, AND J. P. MYERS. 1984. Notes on the predators, especially the peregrine, of Sanderling on the Peruvian coast. *Wader Study Group Bulletin* 42:31–32.
- BRITTEN, M. W., P. L. KENNEDY, AND S. AMBROSE. 1999. Performance and accuracy of small satellite transmitters. *Journal of Wildlife Management* 63: 1349–1358.
- BUCHANAN, J. B. 1996. A comparison of behavior and success rates of Merlins and Peregrine Falcons when hunting Dunlins in two coastal habitats. *Journal of Raptor Research* 30:93–98.
- BYERS, G. W. 1957. *Falco peregrinus* at sea. *Auk* 74: 265.
- CHAVEZ-RAMIREZ, F., G. P. VOSE, AND A. TENNANT. 1994. Spring and fall migration of Peregrine Falcons from Padre Island, Texas. *Wilson Bulletin* 106:138–145.
- CRADDOCK, D. R., AND R. D. CARLSON. 1970. Peregrine Falcon observed feeding far at sea. *Condor* 72: 375–376.
- CRESSWELL, W., AND D. P. WHITFIELD. 1994. The effects of raptor predation on wintering wader populations at the Tynninghame estuary, southeast Scotland. *Ibis* 136:223–232.
- DEKKER, D. 1984. Spring and fall migrations of Peregrine Falcons in central Alberta, 1979–1983, with comparisons to 1969–1978. *Journal of Raptor Research* 18:92–97.
- DEKKER, D. 1988. Peregrine Falcon and Merlin predation on small shorebirds and passerines in Alberta. *Canadian Journal of Zoology* 66:925–928.
- DOBLER, F. C., AND R. D. SPENCER. 1989. Wintering Peregrine Falcon *Falco peregrinus* habitat utilization in Grays Harbor, Washington, p. 71–78. *In* B.-U. Meyburg and R. D. Chancellor [EDS.], *Raptors in the modern world*. World Working Group on Birds of Prey, Berlin.
- ENDERSON, J. H. 1965. A breeding and migration survey of the Peregrine Falcon. *Wilson Bulletin* 77: 327–329.
- ENDERSON, J. H. 1969. Coastal migration data as population indices for the Peregrine Falcon, p. 505–508. *In* J. J. Hickey [ed.], *Peregrine Falcon populations, their biology and decline*. University of Wisconsin Press, Madison, WI.
- ENDERSON, J. H., J. LARRABEE, Z. JONES, C. PEPPER, AND C. LEPISTO. 1995. Behavior of peregrines in winter in south Texas. *Journal of Raptor Research* 29:93–98.
- FULLER, M. R., W. S. SEEGAR, AND L. S. SCHUECK. 1998. Routes and travel rates of migrating Peregrine Falcons *Falco peregrinus* and Swainson's Hawks *Buteo swainsoni* in the Western Hemisphere. *Journal of Avian Biology* 29:433–440.
- GRAYSON, A. J. 1872. On the physical geography and natural history of the Islands of the Tres Marias and of Socorro, off the west coast of Mexico. *Proceedings of the Boston Society of Natural History* 14:261–304.
- HERNÁNDEZ, D. A., AND J. R. ZOOK. 1993. Northward migration of Peregrine Falcons along the Caribbean coast of Costa Rica. *Journal of Raptor Research* 27:123–125.
- HUNT, W. G., R. R. ROGERS, AND D. J. SLOWE. 1975. Migratory and foraging behavior of Peregrine Falcons on the Texas coast. *Canadian Field Naturalist* 89:111–123.
- HUNT, W. G., AND F. P. WARD. 1988. Habitat selection by spring migrant peregrines at Padre Island, Texas, p. 527–535. *In* T. J. Cade, J. H. Enderson, C. J. Thelander, and C. M. White [EDS.], *Peregrine Falcon populations: their management and recovery*. The Peregrine Fund, Inc., Boise, ID.
- IÑIGO, E., AND R. DOMINGUEZ. 1989. Threats to raptors during the migration and non-breeding season in Mexico, p. 59–60. *In* B.-U. Meyburg and R. D. Chancellor [EDS.], *Raptors in the modern world*. World Working Group on Birds of Prey, Berlin.
- KENWARD, R. 1987. *Wildlife radio tagging*. Academic Press, London.
- KENWARD, R. E., AND K. H. HODDER. 1996. *Ranges V: an analytical system for biological location data*. Institute of Terrestrial Ecology, Wareham, UK.
- KERLINGER, P. 1989. *Flight strategies of migrating hawks*. University of Chicago Press, Chicago.
- KUYT, E. 1967. Two banding returns for Golden Eagle and Peregrine Falcon. *Bird-Banding* 38:78–79.
- MEYBURG, B.-U., J. M. MENDELSON, D. H. ELLIS, D. G. SMITH, C. MEYBURG, AND A. C. KEMP. 1995. Year-round movements of a Wahlberg's Eagle *Aquila wahlbergi* tracked by satellite. *Ostrich* 66: 135–140.
- MOHR, C. O. 1947. Table of equivalent populations of North American small mammals. *American Midland Naturalist* 37:223–249.
- MORRISON, R. I. G., R. K. ROSS, P. J. GUZMAN, AND A. ESTRADA. 1993. Aerial surveys of Nearctic shorebirds wintering in Mexico: preliminary results of surveys in the Gulf of Mexico and Caribbean. *Canadian Wildlife Service Progress Note No. 206*, Ottawa, Ontario, Canada.
- MURPHY, R. K., AND M. T. GREEN. 1992. Migrant Peregrine Falcons in northwestern North Dakota in spring. *Journal of Raptor Research* 26:101–102.
- PALMER, R. S. 1988. *Handbook of North American birds*. Vol. 5. Yale University Press, New Haven, CT.
- RAMOS, M. A., AND J. H. RAPPOLE. 1994. Relative homing abilities of migrants and residents in tropical rain forest of southern Veracruz, Mexico. *Bird Conservation International* 4:175–180.
- RAPPOLE, J. H., M. A. RAMOS, R. J. OEHLenschLAGER, D. W. WARNER, AND C. P. BARKAN. 1979. Timing of migration and route selection in North American songbirds, p. 199–214. *In* E. Lynn Drawe

- [ED.], Proceedings of the first Welder Wildlife Foundation symposium. Welder Wildlife Foundation, Sinton, TX.
- RATCLIFFE, D. 1993. *The Peregrine Falcon*. 2nd ed. T & A. D. Poyser, London.
- RESTANI, M., AND W. G. MATTOX. 2000. Natal dispersal of Peregrine Falcons in Greenland. *Auk* 117:500–504.
- RUSSELL, R. 2001. Fall trans-Gulf migration and use of offshore oil platforms by Peregrine Falcons (*Falco peregrinus*), p. 160. *In* Abstracts of the 4th Eurasian Congress on Raptors. Raptor Research Foundation. Seville, Spain.
- SCHMUTZ, J. K., R. W. FYFE, U. BANASCH, AND H. ARM-BRUSTER. 1991. Routes and timing of migration of falcons banded in Canada. *Wilson Bulletin* 103: 44–58.
- SERVICE ARGOS, INC. [ONLINE]. 2001. Service Argos, Inc. (<http://www.argosinc.com/>) (10 November 2001).
- SHOR, W. 1970. Banding recoveries of arctic migrant peregrines of the Atlantic coast and Greenland populations. *Raptor Research News* 4:125–131.
- UETA, M., F. SATO, H. NAKAGAWA, AND N. MITA. 2000. Migration routes and differences of migration schedule between adult and young Steller's Sea Eagles. *Ibis* 142:35–39.
- WHITE, C. M. D. 1968. Diagnosis and relationships of the North American tundra-inhabiting Peregrine Falcons. *Auk*:179–191.
- WHITE, C. M., R. W. RISEBROUGH, AND S. A. TEMPLE. 1989. Observations of North American peregrines in South America, p. 89–93. *In* B.-U. Meyburg and R. D. Chancellor [EDS.], *Raptors in the modern world*. World Working Group on Birds of Prey, Berlin.
- WINKER, K., J. H. RAPPOLE, AND M. A. RAMOS. 1990. Population dynamics of the Wood Thrush (*Hylodichla mustelina*) on its wintering grounds in southern Veracruz, Mexico. *Condor* 92:444–460.
- YATES, M. A., K. E. RIDDLE, AND F. P. WARD. 1988. Recoveries of Peregrine Falcons migrating through the eastern and central United States, 1955–1985, p. 471–484. *In* T. J. Cade, J. H. Enderson, C. J. Thelander, and C. M. White [EDS.], *Peregrine Falcon populations: their management and recovery*. The Peregrine Fund, Inc., Boise, ID.
